# Supplementary material
Source: PubMed Central journal article supplement (PMC3115095)

Sup.Figure 1

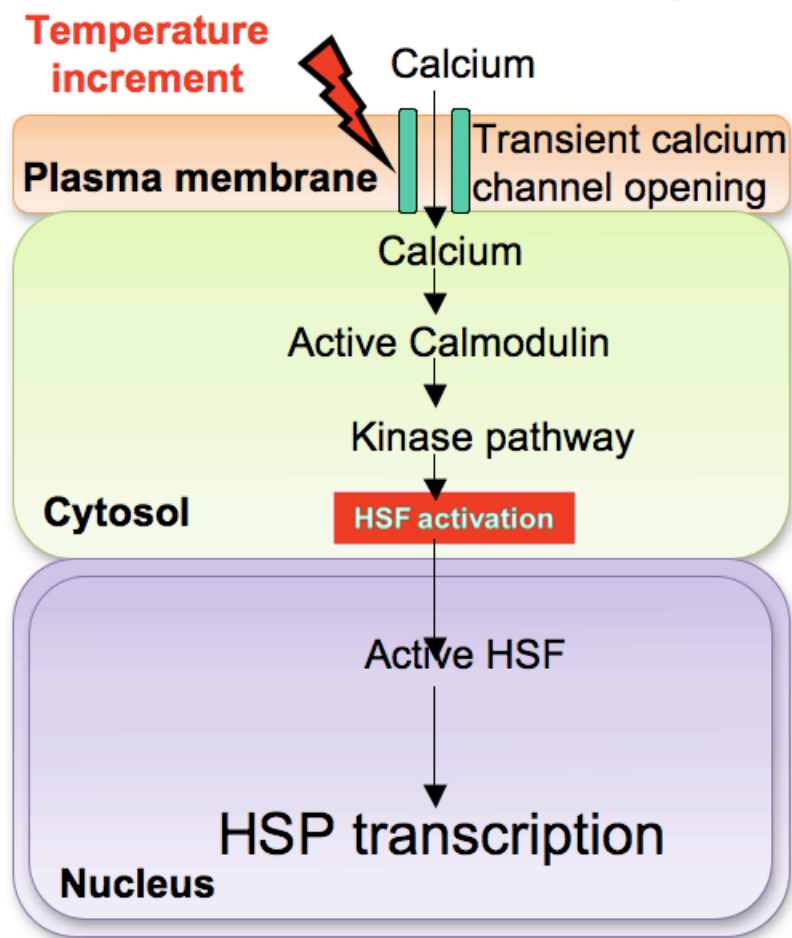

Supplement: psb0512_1530SD1.pdf [file psb0512_1530SD1.pdf]
